# Supplementary material for: Bolus Estimation—Rethinking the Effect of Meal Fat Content
Source: PubMed Central journal article supplement — Diabetes Technol Ther. 2015 Dec 1;17(12):860–6. doi: 10.1089/dia.2015.0118 (PMC4677112; doi:10.1089/dia.2015.0118), 2015-12-01
Supplement: Supp_Table1.pdf [file Supp_Table1.pdf]

## Supplementary Data

*Estimated parameter values for each subject*

SUPPLEMENTARY TABLE S1. ESTIMATED VALUES OF INSULIN SENSITIVITY, NET HEPATIC GLUCOSE BALANCE, GLUCOSE EFFECT AT ZERO INSULIN, AND TIME OF PEAK MEAL-GLUCOSE APPEARANCE DURING THE DINNER WINDOW (6 P.M.–11 P.M.)

| Subject    | $S_I \times 10^{-4}$ (mL/ $\mu$ U/min) |                  | $\tau_m$ (min)   |                   | NHGB <sub>0</sub> (mg/dL/min) |                 | GEZI $\times 10^{-2}$ (min <sup>-1</sup> ) |                  |
|------------|----------------------------------------|------------------|------------------|-------------------|-------------------------------|-----------------|--------------------------------------------|------------------|
|            | LF                                     | HF               | LF               | HF                | LF                            | HF              | LF                                         | HF               |
| 1          | 4.33<br>(28.02)                        | 1.94<br>(13.47)  | 77.00<br>(16.48) | 148.00<br>(26.29) | 1.65<br>(56.77)               | 1.51<br>(46.35) | 0.55<br>(30.58)                            | 0.50<br>(32.37)  |
| 2          | 9.67<br>(18.95)                        | 8.38<br>(11.94)  | 69.00<br>(12.31) | 74.00<br>(23.87)  | 1.65<br>(38.15)               | 1.51<br>(72.06) | 0.55<br>(24.41)                            | 0.50<br>(35.95)  |
| 3          | 6.39<br>(22.30)                        | 6.18<br>(11.93)  | 75.00<br>(26.92) | 122.00<br>(16.38) | 1.65<br>(36.81)               | 6.11<br>(11.27) | 0.55<br>(26.10)                            | 2.04<br>(13.97)  |
| 4          | 10.68<br>(37.25)                       | 10.68<br>(92.00) | 80.00<br>(15.46) | 81.00<br>(10.97)  | 1.65<br>(48.75)               | 2.81<br>(38.84) | 0.55<br>(91.96)                            | 0.50<br>(109.19) |
| 5          | 6.95<br>(17.20)                        | 3.62<br>(26.55)  | 74.00<br>(24.07) | 148.00<br>(16.87) | 2.39<br>(39.72)               | 4.81<br>(11.56) | 0.50<br>(45.58)                            | 1.61<br>(21.50)  |
| 6          | 10.71<br>(10.67)                       | 10.1<br>(19.98)  | 46.00<br>(20.37) | 57.00<br>(29.65)  | 2.25<br>(25.60)               | 1.65<br>(48.48) | 0.75<br>(28.11)                            | 0.55<br>(43.49)  |
| 7          | 12.31<br>(17.43)                       | 9.84<br>(12.66)  | 74.00<br>(26.68) | 85.00<br>(13.79)  | 6.62<br>(20.03)               | 3.08<br>(43.49) | 2.21<br>(56.49)                            | 0.50<br>(91.08)  |
| Mean<br>SE | 8.72<br>1.08                           | 7.25<br>1.08     | 71.00<br>1.08    | 102.00<br>14.00   | 2.55<br>0.69                  | 3.07<br>0.68    | 0.81<br>0.24                               | 0.89<br>0.25     |

Values in parentheses show the fractional SDs.

$\tau_m$ , time of peak meal-glucose appearance; GEZI, glucose effect at zero insulin; HF, high-fat dinner; LF, low-fat dinner; NHGB<sub>0</sub>, net hepatic glucose balance at zero insulin and zero glucose;  $S_I$ , insulin sensitivity.
