# Supplementary material for: Bolus Estimation—Rethinking the Effect of Meal Fat Content
Source: PubMed Central journal article supplement — Diabetes Technol Ther. 2015 Dec 1;17(12):860–6. doi: 10.1089/dia.2015.0118 (PMC4677112; doi:10.1089/dia.2015.0118), 2015-12-01
Supplement: Supp_Tables1-4.pdf [file Supp_Tables1-4.pdf]

## Supplementary Data

*Estimated parameter values for each subject*

SUPPLEMENTARY TABLE S1. ESTIMATED VALUES OF INSULIN SENSITIVITY, NET HEPATIC GLUCOSE BALANCE, GLUCOSE EFFECT AT ZERO INSULIN, AND TIME OF PEAK MEAL-GLUCOSE APPEARANCE DURING THE DINNER WINDOW (6 P.M.–11 P.M.)

| Subject    | $S_I \times 10^{-4}$ (mL/ $\mu$ U/min) |                  | $\tau_m$ (min)   |                   | NHGB <sub>0</sub> (mg/dL/min) |                 | GEZI $\times 10^{-2}$ (min <sup>-1</sup> ) |                  |
|------------|----------------------------------------|------------------|------------------|-------------------|-------------------------------|-----------------|--------------------------------------------|------------------|
|            | LF                                     | HF               | LF               | HF                | LF                            | HF              | LF                                         | HF               |
| 1          | 4.33<br>(28.02)                        | 1.94<br>(13.47)  | 77.00<br>(16.48) | 148.00<br>(26.29) | 1.65<br>(56.77)               | 1.51<br>(46.35) | 0.55<br>(30.58)                            | 0.50<br>(32.37)  |
| 2          | 9.67<br>(18.95)                        | 8.38<br>(11.94)  | 69.00<br>(12.31) | 74.00<br>(23.87)  | 1.65<br>(38.15)               | 1.51<br>(72.06) | 0.55<br>(24.41)                            | 0.50<br>(35.95)  |
| 3          | 6.39<br>(22.30)                        | 6.18<br>(11.93)  | 75.00<br>(26.92) | 122.00<br>(16.38) | 1.65<br>(36.81)               | 6.11<br>(11.27) | 0.55<br>(26.10)                            | 2.04<br>(13.97)  |
| 4          | 10.68<br>(37.25)                       | 10.68<br>(92.00) | 80.00<br>(15.46) | 81.00<br>(10.97)  | 1.65<br>(48.75)               | 2.81<br>(38.84) | 0.55<br>(91.96)                            | 0.50<br>(109.19) |
| 5          | 6.95<br>(17.20)                        | 3.62<br>(26.55)  | 74.00<br>(24.07) | 148.00<br>(16.87) | 2.39<br>(39.72)               | 4.81<br>(11.56) | 0.50<br>(45.58)                            | 1.61<br>(21.50)  |
| 6          | 10.71<br>(10.67)                       | 10.1<br>(19.98)  | 46.00<br>(20.37) | 57.00<br>(29.65)  | 2.25<br>(25.60)               | 1.65<br>(48.48) | 0.75<br>(28.11)                            | 0.55<br>(43.49)  |
| 7          | 12.31<br>(17.43)                       | 9.84<br>(12.66)  | 74.00<br>(26.68) | 85.00<br>(13.79)  | 6.62<br>(20.03)               | 3.08<br>(43.49) | 2.21<br>(56.49)                            | 0.50<br>(91.08)  |
| Mean<br>SE | 8.72<br>1.08                           | 7.25<br>1.08     | 71.00<br>1.08    | 102.00<br>14.00   | 2.55<br>0.69                  | 3.07<br>0.68    | 0.81<br>0.24                               | 0.89<br>0.25     |

Values in parentheses show the fractional SDs.

$\tau_m$ , time of peak meal-glucose appearance; GEZI, glucose effect at zero insulin; HF, high-fat dinner; LF, low-fat dinner; NHGB<sub>0</sub>, net hepatic glucose balance at zero insulin and zero glucose;  $S_I$ , insulin sensitivity.

SUPPLEMENTARY TABLE S2. ESTIMATED VALUES OF INSULIN SENSITIVITY, NET HEPATIC GLUCOSE BALANCE, GLUCOSE EFFECT AT ZERO INSULIN, AND TIME OF PEAK MEAL-GLUCOSE APPEARANCE DURING THE BREAKFAST WINDOW (8 A.M.–12 P.M.)

| Subject    | $S_I \times 10^{-4}$ (mL/ $\mu$ U/min) |                  | $\tau_m$ (min)   |                  | NHGB <sub>0</sub> (mg/dL/min) |                 | GEZI $\times 10^{-2}$ (min <sup>-1</sup> ) |                  |
|------------|----------------------------------------|------------------|------------------|------------------|-------------------------------|-----------------|--------------------------------------------|------------------|
|            | LF                                     | HF               | LF               | HF               | LF                            | HF              | LF                                         | HF               |
| 1          | 4.81<br>(16.03)                        | 1.07<br>(31.95)  | 45.00<br>(16.59) | 74.00<br>(16.60) | 1.51<br>(19.44)               | 1.51<br>(31.53) | 0.50<br>(31.91)                            | 0.50<br>(24.34)  |
| 2          | 8.37<br>(24.75)                        | 8.46<br>(29.85)  | 57.00<br>(17.23) | 54.00<br>(10.96) | 1.51<br>(85.10)               | 1.51<br>(49.44) | 0.50<br>(53.64)                            | 0.50<br>(30.91)  |
| 3          | 3.91<br>(19.04)                        | 9.09<br>(25.04)  | 96.00<br>(16.12) | 61.00<br>(24.29) | 1.65<br>(63.31)               | 1.65<br>(60.69) | 0.55<br>(53.21)                            | 0.55<br>(122.52) |
| 4          | 9.68<br>(26.63)                        | 12.31<br>(56.15) | 43.00<br>(18.42) | 32.00<br>(10.50) | 1.71<br>(74.50)               | 1.65<br>(12.17) | 0.50<br>(44.84)                            | 0.55<br>(97.22)  |
| 5          | 3.44<br>(18.97)                        | 2.78<br>(33.21)  | 58.00<br>(11.56) | 60.00<br>(18.62) | 1.51<br>(14.40)               | 1.51<br>(51.49) | 0.50<br>(14.94)                            | 0.50<br>(57.31)  |
| 6          | 12.31<br>(27.10)                       | 7.1<br>(18.80)   | 49.00<br>(25.68) | 46.00<br>(11.86) | 1.51<br>(20.37)               | 1.51<br>(36.84) | 0.50<br>(27.93)                            | 0.50<br>(58.96)  |
| 7          | 4.55<br>(12.83)                        | 4.06<br>(18.14)  | 72.00<br>(16.24) | 69.00<br>(19.33) | 1.51<br>(56.30)               | 1.51<br>(64.34) | 0.50<br>(30.56)                            | 0.50<br>(35.71)  |
| Mean<br>SE | 6.72<br>1.29                           | 6.41<br>1.50     | 60.00<br>7.00    | 57.00<br>5.00    | 1.56<br>0.03                  | 1.55<br>0.03    | 0.50<br>0.01                               | 0.51<br>0.01     |

Values in parentheses show the fractional SDs.

$\tau_m$ , time of peak meal-glucose appearance; GEZI, glucose effect at zero insulin; HF, high-fat dinner; LF, low-fat dinner; NHGB<sub>0</sub>, net hepatic glucose balance at zero insulin and zero glucose;  $S_I$ , insulin sensitivity.

Supplementary Table S3. Estimated values of the fixed parameters and insulin sensitivity, net hepatic glucose balance, and glucose effect at zero insulin during the night (two intervals)

| Subject | $V_G/A_G$<br>(dL) | $\tau_1$<br>(min) | $\tau_2$<br>(min) | $P_2$<br>( $\text{min}^{-1}$ ) | $T_N$<br>(a.m.) | $C_{INS}$<br>(mL/min) | $S_{0(N1)} \times 10^{-4}$<br>(mL $\mu$ U/min) |                  | $GEZI_{(N1)} \times 10^{-2}$<br>( $\text{min}^{-1}$ ) |                  | $NHGB_{0(N1)}$<br>(mg/dL/min) |                 | $S_{0(N2)} \times 10^{-4}$<br>(mL $\mu$ U/min) |                  | $GEZI_{(N2)} \times 10^{-2}$<br>( $\text{min}^{-1}$ ) |                 | $NHGB_{0(N2)}$<br>(mg/dL/min) |                 |
|---------|-------------------|-------------------|-------------------|--------------------------------|-----------------|-----------------------|------------------------------------------------|------------------|-------------------------------------------------------|------------------|-------------------------------|-----------------|------------------------------------------------|------------------|-------------------------------------------------------|-----------------|-------------------------------|-----------------|
|         |                   |                   |                   |                                |                 |                       | LF                                             | HF               | LF                                                    | HF               | LF                            | HF              | LF                                             | HF               | LF                                                    | HF              | LF                            | HF              |
| 1       | 108.00<br>(59.84) | 206.00<br>(20.17) | 47.00<br>(39.02)  | 0.006<br>(40.72)               | All             | 421.00<br>(13.90)     | 5.72<br>(32.82)                                | 12.30<br>(18.05) | 0.55<br>(32.41)                                       | 0.65<br>(58.89)  | 1.65<br>(26.23)               | 4.34<br>(32.42) | 3.67<br>(15.30)                                | 0.45<br>(18.11)  | 1.61<br>(13.43)                                       | 0.50<br>(41.03) | 4.8<br>(17.50)                | 1.94<br>(21.40) |
| 2       | 77.00<br>(18.67)  | 153.00<br>(21.34) | 26.00<br>(47.23)  | 0.014<br>(20.45)               | 6:45            | 1,191.00<br>(12.78)   | 4.59<br>(19.49)                                | 12.31<br>(18.98) | 0.50<br>(26.31)                                       | 0.50<br>(73.73)  | 1.81<br>(40.31)               | 3.32<br>(15.28) | 12.31<br>(26.84)                               | 2.34<br>(90.84)  | 1.01<br>(25.53)                                       | 0.50<br>(17.42) | 3.49<br>(11.95)               | 1.51<br>(31.91) |
| 3       | 80.00<br>(48.21)  | 416.00<br>(21.38) | 23.00<br>(27.66)  | 0.01<br>(32.54)                | 4:18            | 388.00<br>(21.32)     | 7.81<br>(13.78)                                | 2.76<br>(15.41)  | 0.55<br>(22.73)                                       | 0.80<br>(32.69)  | 3.26<br>(58.38)               | 2.64<br>(47.09) | 2.28<br>(54.62)                                | 6.2<br>(26.39)   | 0.55<br>(34.07)                                       | 0.55<br>(48.98) | 1.65<br>(49.96)               | 2.47<br>(78.74) |
| 4       | 168.00<br>(83.38) | 120.00<br>(50.86) | 59.00<br>(71.55)  | 0.004<br>(46.30)               | 4:10            | 956.00<br>(15.36)     | 10.02<br>(79.23)                               | 12.31<br>(81.93) | 0.55<br>(49.29)                                       | 0.50<br>(52.41)  | 1.65<br>(95.09)               | 1.51<br>(74.72) | 3.35<br>(27.37)                                | 12.31<br>(87.83) | 0.50<br>(113.52)                                      | 0.55<br>(46.38) | 1.51<br>(60.83)               | 1.65<br>(74.74) |
| 5       | 177.00<br>(39.49) | 115.00<br>(21.55) | 115.00<br>(21.55) | 0.006<br>(27.02)               | 4:17            | 788.00<br>(18.48)     | 6.24<br>(28.32)                                | 12.31<br>(15.91) | 0.55<br>(25.33)                                       | 0.70<br>(100.49) | 1.65<br>(14.19)               | 4.63<br>(77.47) | 3.35<br>(45.27)                                | 3.35<br>(47.71)  | 0.71<br>(44.11)                                       | 0.50<br>(13.26) | 2.12<br>(64.72)               | 2.78<br>(60.04) |
| 6       | 206.00<br>(86.78) | 45.00<br>(17.09)  | 45.00<br>(17.09)  | 0.035<br>(13.80)               | 4:04            | 1,473.00<br>(29.12)   | 8.55<br>(59.51)                                | 12.31<br>(45.18) | 0.50<br>(63.71)                                       | 0.50<br>(117.74) | 1.51<br>(64.98)               | 1.51<br>(43.45) | 12.31<br>(61.77)                               | 12.31<br>(51.23) | 1.50<br>(43.11)                                       | 0.82<br>(13.15) | 4.47<br>(42.58)               | 2.62<br>(17.74) |
| 7       | 113.00<br>(80.53) | 174.00<br>(16.29) | 40.00<br>(27.92)  | 0.034<br>(23.67)               | 4:28            | 1,042.00<br>(12.85)   | 12.31<br>(72.02)                               | 12.26<br>(30.78) | 1.80<br>(76.95)                                       | 0.86<br>(64.99)  | 5.36<br>(30.13)               | 4.65<br>(59.36) | 12.31<br>(67.36)                               | 12.31<br>(63.55) | 1.28<br>(20.35)                                       | 0.72<br>(11.98) | 3.84<br>(28.13)               | 4.79<br>(76.35) |
| Mean    | 133.00            | 176.00            | 51.00             | 0.016                          | 4:34            | 894.00                | 7.89                                           | 10.94            | 0.71                                                  | 0.64             | 2.41                          | 3.23            | 7.08                                           | 7.04             | 1.02                                                  | 0.59            | 3.13                          | 2.54            |
| SE      | 19.00             | 44.00             | 12.00             | 0.005                          | 0:22            | 150.00                | 1.01                                           | 1.36             | 0.18                                                  | 0.06             | 0.54                          | 0.52            | 1.86                                           | 1.97             | 0.17                                                  | 0.05            | 0.51                          | 0.42            |

Values in parentheses show the fractional SDs.

$\tau_1$  and  $\tau_2$ , insulin time constants for subcutaneous insulin concentration and plasma insulin concentration, respectively;  $C_{INS}$ , insulin clearance;  $GEZI$ , glucose effect at zero insulin; HF, high-fat dinner; LF, low-fat dinner; N1, 11 p.m.–T<sub>N</sub>; N2, T<sub>N</sub>–8 a.m.;  $NHGB_0$ , net hepatic glucose balance at zero insulin and zero glucose;  $S_1$ , insulin sensitivity; T<sub>N</sub>, transition time;  $V_G/A_G$ , ratio of the glucose distribution volume to the bioavailability of meal carbohydrate.

Supplementary meals information

SUPPLEMENTARY TABLE S4. SUPPLEMENTARY MEALS GIVEN TO EACH SUBJECT AND THE ESTIMATED TIME OF PEAK MEAL-GLUCOSE APPEARANCE FOR EACH MEAL UNDER BOTH THE LOW-/HIGH-FAT DINNER SCENARIOS

| Subject | Low-fat dinner |                  |                | High-fat dinner |                  |                |
|---------|----------------|------------------|----------------|-----------------|------------------|----------------|
|         | Time (clock h) | Carbohydrate (g) | $\tau_m$ (min) | Time (clock h)  | Carbohydrate (g) | $\tau_m$ (min) |
| 1       | 22:20          | 15.0             | 148 (67.45)    | 23:30           | 15.0             | 37 (15.73)     |
|         | 22:40          | 15.0             | 148 (20.85)    | 00:00           | 15.0             | 148 (50.16)    |
|         | 23:00          | 15.0             | 148 (35.64)    | 00:30           | 15.0             | 148 (22.41)    |
|         | 23:20          | 15.0             | 139 (34.55)    | 01:00           | 15.0             | 148 (19.04)    |
|         | 00:30          | 15.0             | 116 (22.81)    | 04:05           | 15.0             | 148 (32.43)    |
|         | 11:10          | 15.0             | 148 (24.03)    |                 |                  |                |
|         | 11:30          | 15.0             | 148 (12.36)    |                 |                  |                |
| 2       | 23:30          | 7.5              | 87 (17.02)     | 23:00           | 15.0             | 148 (21.57)    |
| 3       | 07:05          | 7.5              | 119 (10.42)    | 07:15           | 7.5              | 148 (25.84)    |
|         |                |                  |                | 11:09           | 15.0             | 41 (20.89)     |
| 4       | 11:30          | 15.0             | 43 (18.42)     | 22:40           | 15.0             | 148 (43.76)    |
|         |                |                  |                | 23:38           | 7.5              | 148 (42.92)    |
|         |                |                  |                | 00:00           | 15.0             | 35 (11.23)     |
|         |                |                  |                | 04:30           | 15.0             | 43 (12.53)     |
|         |                |                  |                | 11:40           | 15.0             | 89 (22.70)     |
| 5       | 22:20          | 15.0             | 66 (40.67)     | 03:00           | 15.0             | 52 (24.61)     |
|         | 22:40          | 15.0             | 38 (35.52)     |                 |                  |                |
|         | 23:30          | 15.0             | 97 (15.54)     |                 |                  |                |
| 6       | 04:00          | 7.5              | 119 (29.93)    | 11:00           | 15.0             | 148 (14.24)    |
|         | 07:00          | 15.0             | 148 (53.82)    | 11:20           | 15.0             | 148 (24.80)    |
|         | 07:30          | 15.0             | 148 (58.04)    |                 |                  |                |
|         | 10:40          | 15.0             | 148 (19.46)    |                 |                  |                |
|         | 11:40          | 15.0             | 148 (19.11)    |                 |                  |                |
| 7       |                |                  |                | 22:20           | 15.0             | 134 (34.25)    |

Values in parentheses show the fractional SDs.
